# Supplementary material
Source: PubMed Central journal article supplement (PMC7306806)
Supplement: pnas.1918307117.sapp.pdf [file pnas.1918307117.sapp.pdf]

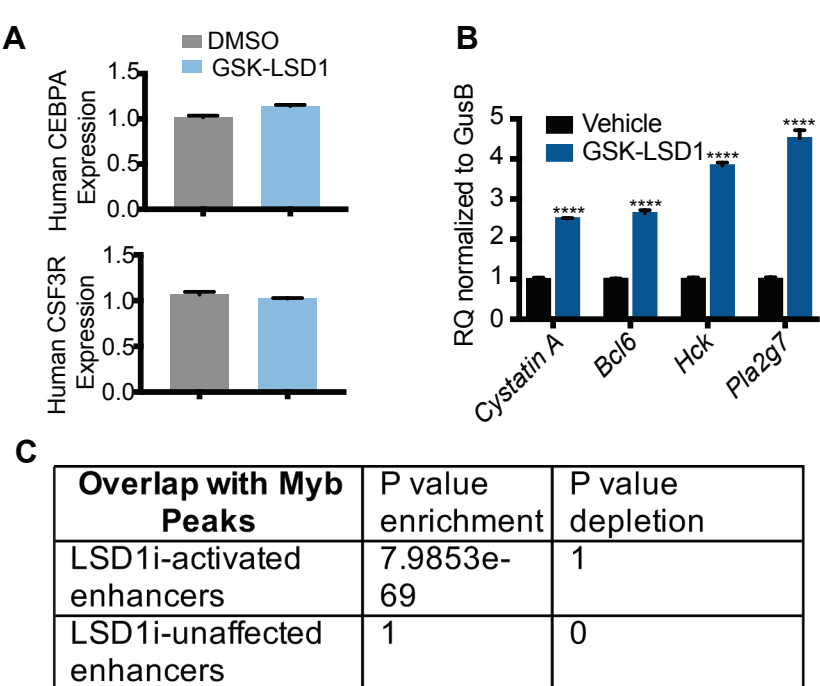

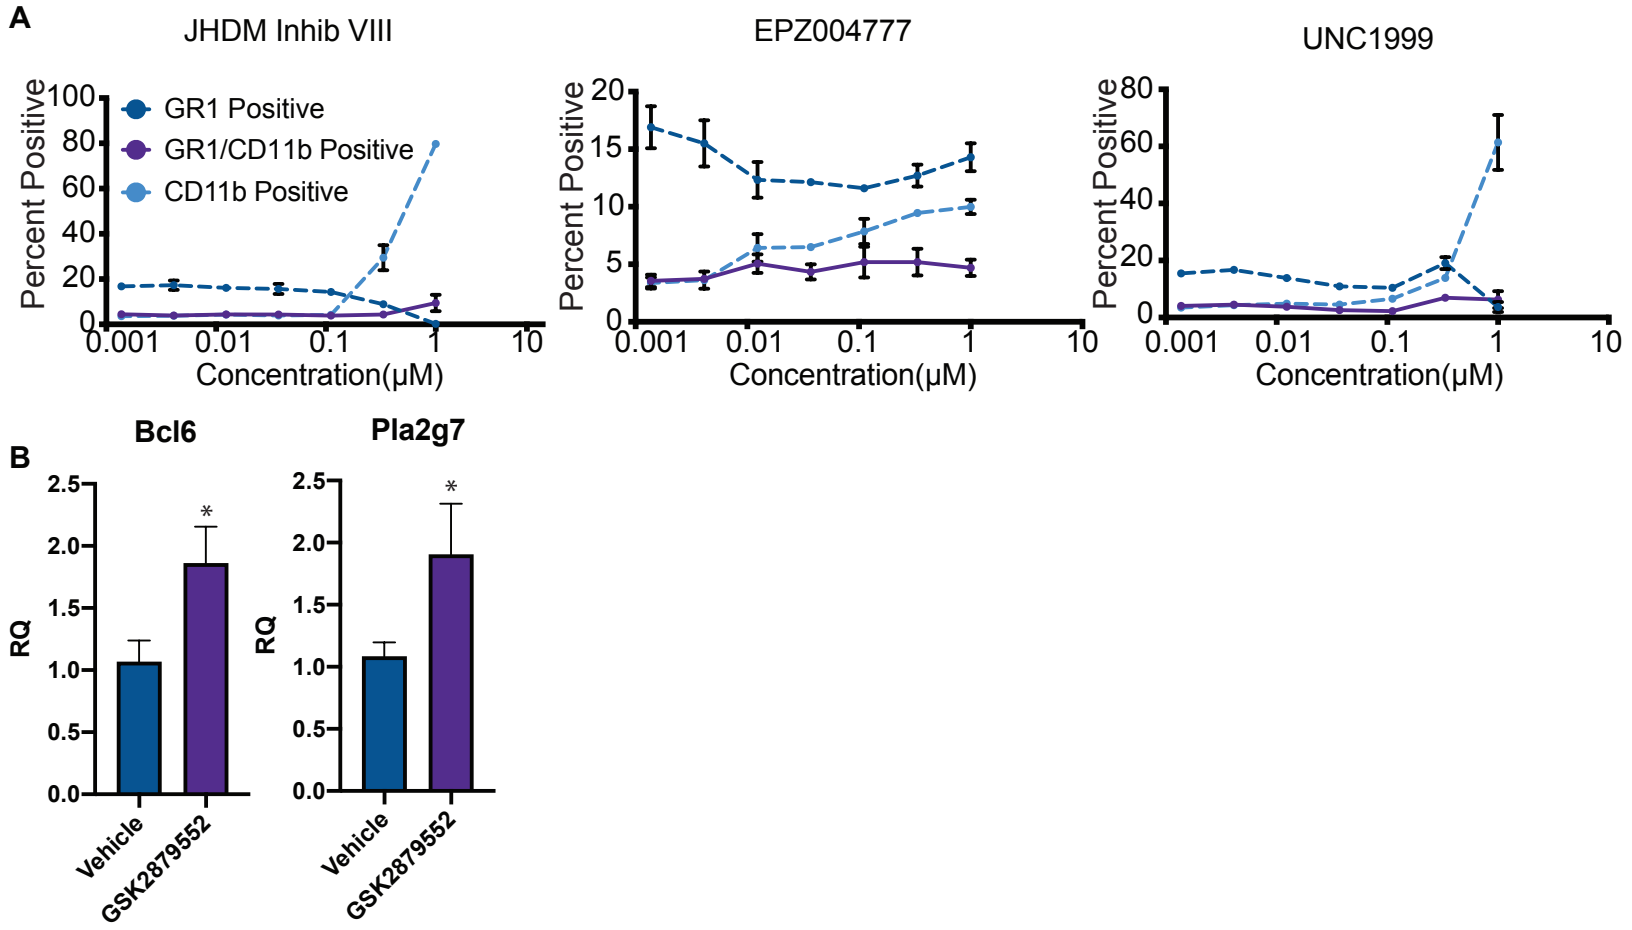

Figure S2.

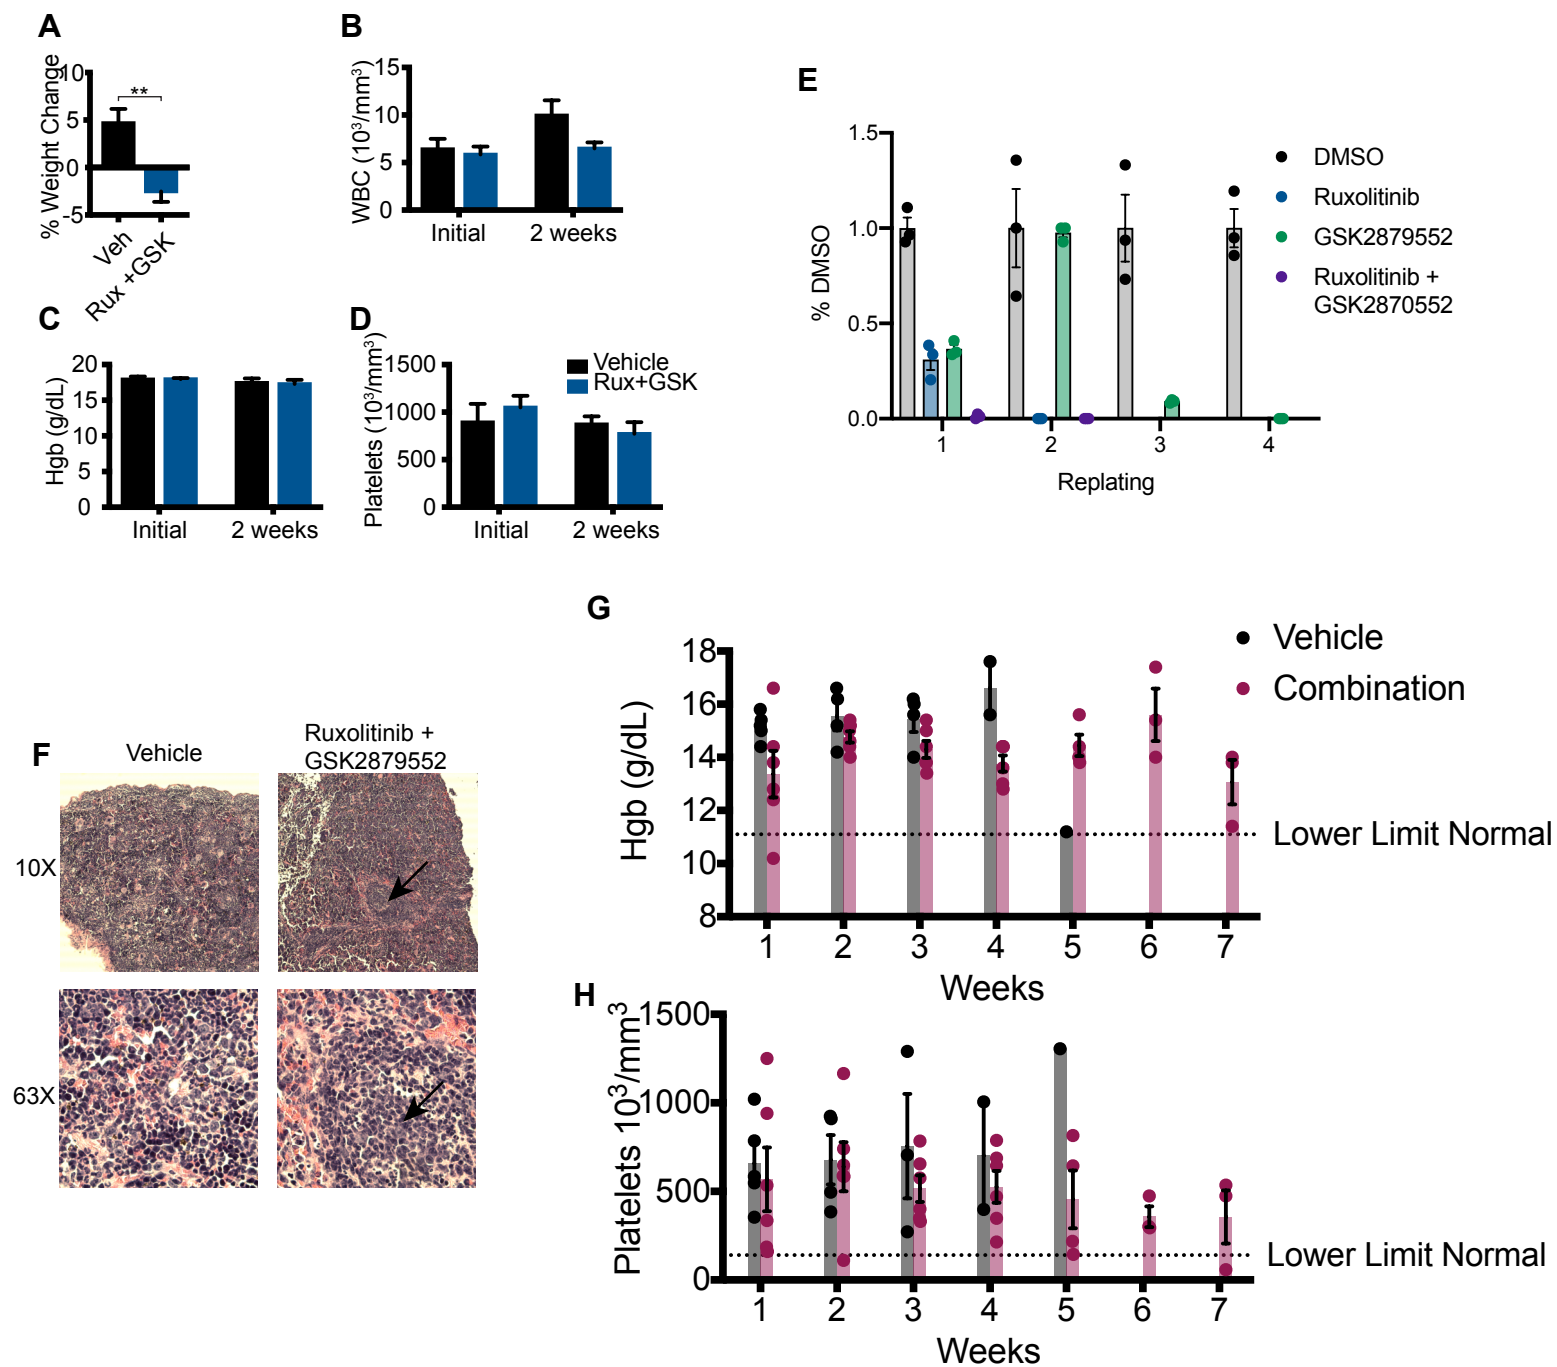

Figure S3.

## Supplementary Figure Legends

### Supplementary Figure 1. LSD1 Inhibition Reactivates Differentiation-Associated Enhancers.

**A.** Human CEBPA expression in murine bone marrow cells immortalized via transduction with CSF3R<sup>T618I</sup> and CEBPA<sup>V314VW</sup> treated with GSK-LSD1 (4 nM for 48 hours) or DMSO relative to mouse *Gusb* (n=3/group). **B.** Expression of select differentiation associated genes in murine bone marrow cells immortalized through expression of CEBPA<sup>V314VW</sup> + CSF3R<sup>T618I</sup> and treated for 48 hours with 4 nM GSK-LSD1 (n=3/group). **C.** Overlap of Myb ChIP-seq peaks with LSD1-inhibitor activated enhancers assessed by bedtools fisher test.

### Supplementary Figure 2. Epigenetic Agents Promote Differentiation in CEBPA/CSF3R Mutant AML with Differing Potency.

**A.** Myeloid differentiation in CEBPA/CSF3R AML cells treated with varying concentrations of the indicated drug for 48 hours as assessed by flow cytometry for GR1 and CD11b. **B.** Expression of Bcl6 and Pla2g7 in the bone marrow of mice harboring CSF3R/CEBPA mutant AML 24 hours after initiation of GSK2879552 treatment (0.75 mg/kg twice daily). Values are represented as mean +/-, \* = p<0.05 by Students t-test, n=9/group.

### Supplementary Figure 3. Combined Inhibition of the JAK/STAT Pathway and LSD1 is Well Tolerated and Restores Normal Splenic Architecture.

**A.** BALB/c mice were treated with Ruxolitinib (90 mg/kg/day) and GSK 2879552 (1.5 mg/kg/day) by twice daily oral gavage for 2 weeks (n=5/group). Weight change during treatment. **B.** WBC count pre and post treatment. **C** Hemoglobin pre and post treatment. **D.** Platelets pre and post treatment. **E.** Serial replating of CSF3R/CEBPA mutant AML cells exposed to Ruxolitinib (100 nM), GSK2879552 (100nM), the combination or DMSO. **F.** Representative images of spleens at survival endpoint. Arrow denotes restoration of follicular architecture in mice treated with Ruxolitinib + GSK2879552. **G, H** Platelets and Hbg during combined Ruxolitinib and GSK2879552 treatment in mice harboring CSF3R/CEBPA mutant AML from Figure 4G. In all cases, values are represented as mean +/- SEM. \*\*: p<0.01 by Students t-test.

## Supplementary Tables

**Supplementary Table 1. RNA Sequencing Analysis on CEBPA/CSF3R AML Cells Treated with LSD1 Inhibitor**

**Supplementary Table 2. Complete GO Analysis for LSD1 Inhibitor RNA Seq**

**Supplementary Table 3. Enhancer Analysis on CEBPA/CSF3R AML Cells Treated with LSD1 Inhibitor**

**Supplementary Table 4. Complete GO Analysis for LSD1 Inhibitor Histone Mark ChIP Seq**

**Supplementary Table 5. RNA Sequencing Analysis on CEBPA/CSF3R AML Cells Treated with JAK/STAT and LSD1 Inhibitor**

46 **Supplementary Table 6. Complete GO Analysis from RNA Sequencing on**  
47 **CEBPA/CSF3R AML Cells Treated with JAK/STAT and LSD1 Inhibitor**  
48 **Supplementary Table 7. Transcription Factor Overlap with DE Genes from RNA**  
49 **Sequencing on CEBPA/CSF3R AML Cells Treated with JAK/STAT and LSD1**  
50 **Inhibitor**  
51
